# Supplementary material for: Mutation load dynamics during environmentally-driven range shifts
Source: PLOS journal article supplement (doi:10.1371/journal.pgen.1007450), 2018-09-28
Supplement: S2 (10.1371/journal.pgen.1007450.s002) [file journal.pgen.1007450.s002]

**Table S2. Simulation parameters.** All parameter combinations simulated in the current study to ensure reproducibility of the results. Software code can be downloaded from <https://github.com/kjgilbert/ExpLoad>. Parameters written in italics within parentheses are the exact software input names used by the simulation. 10 replicate simulations were run with data saved every 100 generations.

| Parameter                                                                        | Setting(s) Used                                            |
|----------------------------------------------------------------------------------|------------------------------------------------------------|
| Genome-wide mutation rate ( <i>mu</i> )                                          | 0.1                                                        |
| Migration rate ( <i>m</i> )                                                      | 0.1                                                        |
| Selection ( <i>selectionMode</i> )                                               | Soft (0), Hard (1)                                         |
| Selection coefficient ( <i>s</i> )                                               | +/-0.005, exponential DFE with mean = +/-0.005             |
| Dominance, <i>h</i> (set with line 301 in Individual.cpp)                        | 0.5, 0.3, 0.0, <i>h-s</i> trade-off (see Methods)          |
| Proportion deleterious loci ( <i>phi</i> )                                       | 0.9                                                        |
| Scenario ( <i>expansionMode</i> )                                                | Linear (0)                                                 |
| Demographic scenario ( <i>expansionModeKim</i> )                                 | Expansion (0), Shift (2)                                   |
| <i>T</i> , number of generations between each step of the shift ( <i>theta</i> ) | NA (free expansion), 5, 10, 15, 20, 25, 30, 40, 50, 60, 84 |
| Generations after burn-in ( <i>gens.to.run</i> )                                 | 4000                                                       |
| Landscape width ( <i>m1</i> )                                                    | 1, 5                                                       |
| Landscape length ( <i>m2</i> )                                                   | 300                                                        |
| Ancestral population size (for burn-in; <i>anc_pop_size</i> )                    | 10000                                                      |
| Ancestral burn-in generation time ( <i>burnin_time</i> )                         | 10                                                         |
| Starting population size ( <i>starting_demes</i> )                               | 5                                                          |
| Starting population burn-in on landscape ( <i>expansion_start</i> )              | 5000                                                       |
| Range shift population size ( <i>niche_width</i> )                               | 5                                                          |
| Carrying capacity ( <i>capacity</i> )                                            | 20, 100, 500                                               |
